# Supplementary material for: Development of an HSV-1 production process involving serum-reduced culturing and bead-to-bead transfer
Source: Springer Nature journal article supplement (doi:10.1007/s00253-024-13193-4), 2024-06-19
Supplement: MOESM1 [file 253_2024_13193_MOESM1_ESM.pdf]

## Supplementary information

**Journal name:** Applied Microbiology and Biotechnology

**Manuscript title:** Development of an HSV-1 production process involving serum-reduced culturing and bead-to-bead transfer

**The names of the authors:** Helin Wang<sup>1</sup>, Xiuhua Hu<sup>1</sup>, Mingfang Zhang<sup>1</sup>, Lin Yang<sup>1</sup>, Yueying Xu<sup>1</sup>, Xiaoxu Gu<sup>1</sup>, Junjun Jiang<sup>1\*</sup>, Weiwei Hu<sup>1\*</sup>

**The affiliations and addresses of the authors:**

<sup>1</sup> Microbial and Viral Platforms (MVP), WuXi Biologics, 291 Fucheng Road, Hangzhou 311106, China

**Corresponding author:**

Dr. Weiwei Hu

E-mail: [hu\\_weiwei0501@wuxibiologics.com](mailto:hu_weiwei0501@wuxibiologics.com)

Dr. Junjun Jiang

E-mail: [jiang\\_junjun@wuxibiologics.com](mailto:jiang_junjun@wuxibiologics.com)

Telephone and fax number: +86-571-60954091

Supplementary figures:

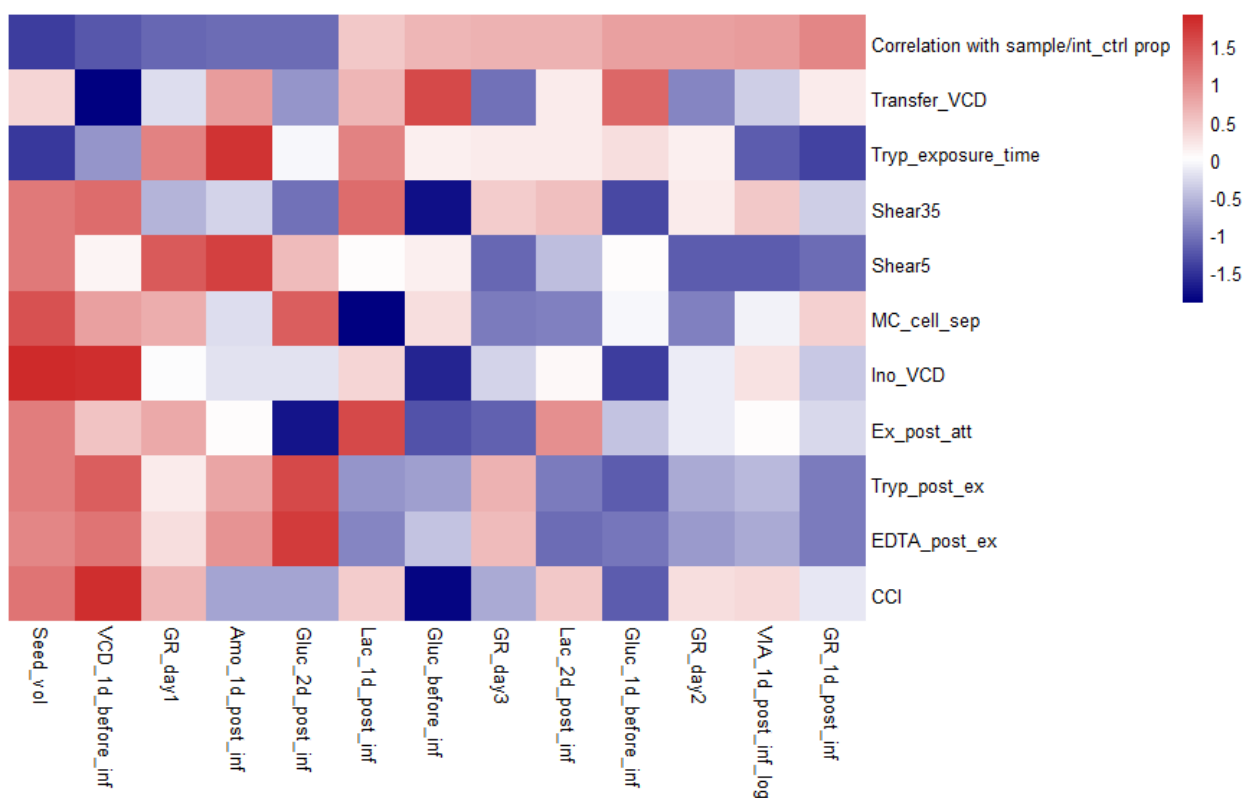

**Figure S1** Correlation factor matrix of secondary correlation analysis

The first row of the matrix shows the correlation between the performance parameters and the sample/internal control proportion (normalized titer). The other rows show the correlation between the performance parameters and the process parameters.

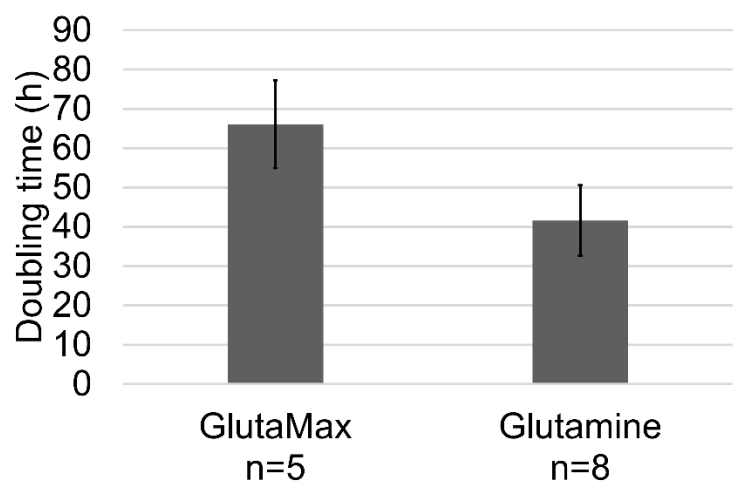

**Figure S2** Doubling time of Vero cells cultured with GlutaMax or glutamine as supplements

Vero cells were cultured with VP-SFM medium in T flasks, and GlutaMax (n=5) or glutamine (n=8) were used as source of glutamine. Doubling times of the cells were shown in the figure.

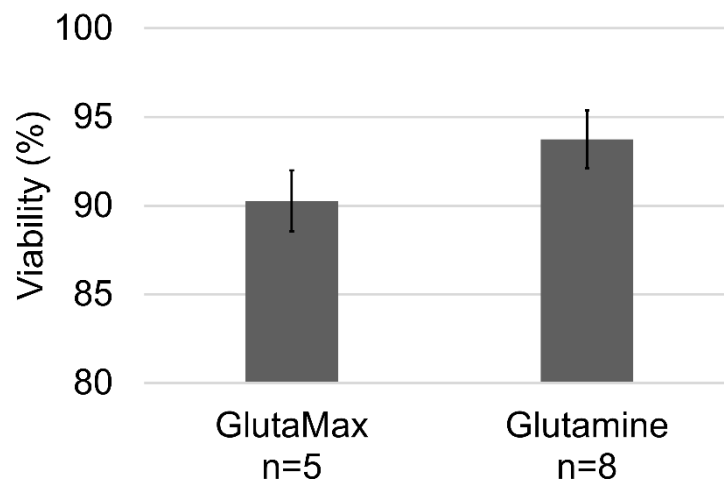

**Figure S3** Viability of Vero cells cultured with GlutaMax or glutamine as supplements

Vero cells were cultured with VP-SFM medium in T flasks, and GlutaMax (n=5) or glutamine (n=8) were used as source of glutamine. Viabilities of the cells were shown in the figure.

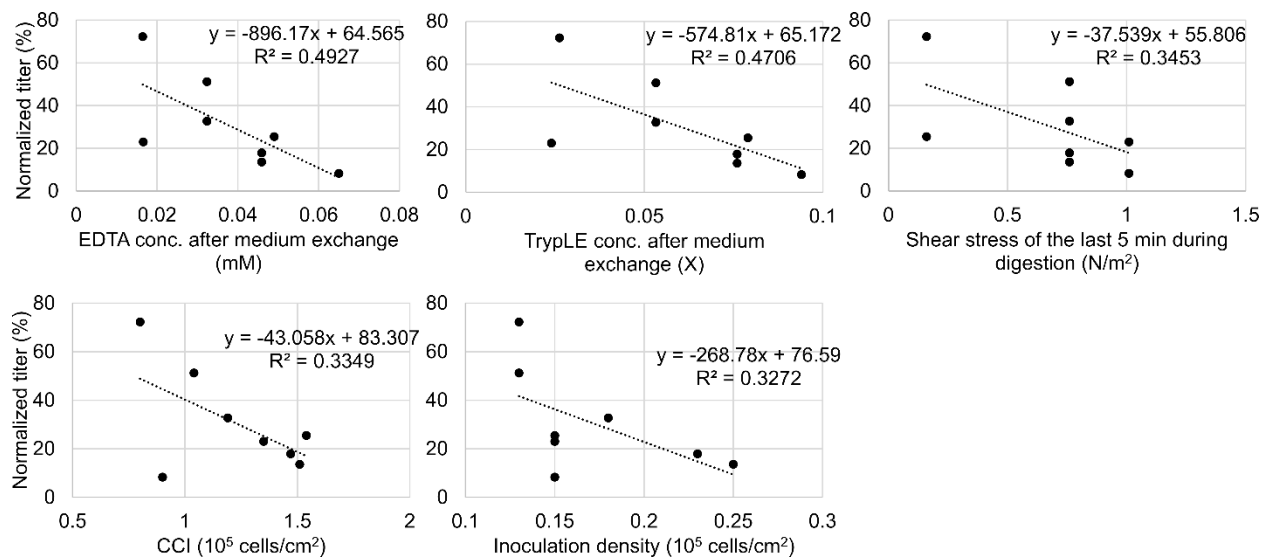

**Figure S4** Linear regression analysis between screened operation parameters and normalized titer. Correlation between normalized titer and the five operation parameters (EDTA and TrypLE concentration after medium exchange, shear stress of the last 5 min during digestion, CCI and inoculation density) were indicated by correlation analysis and PCA. And linear regression was performed to select the optimized level of these parameters.

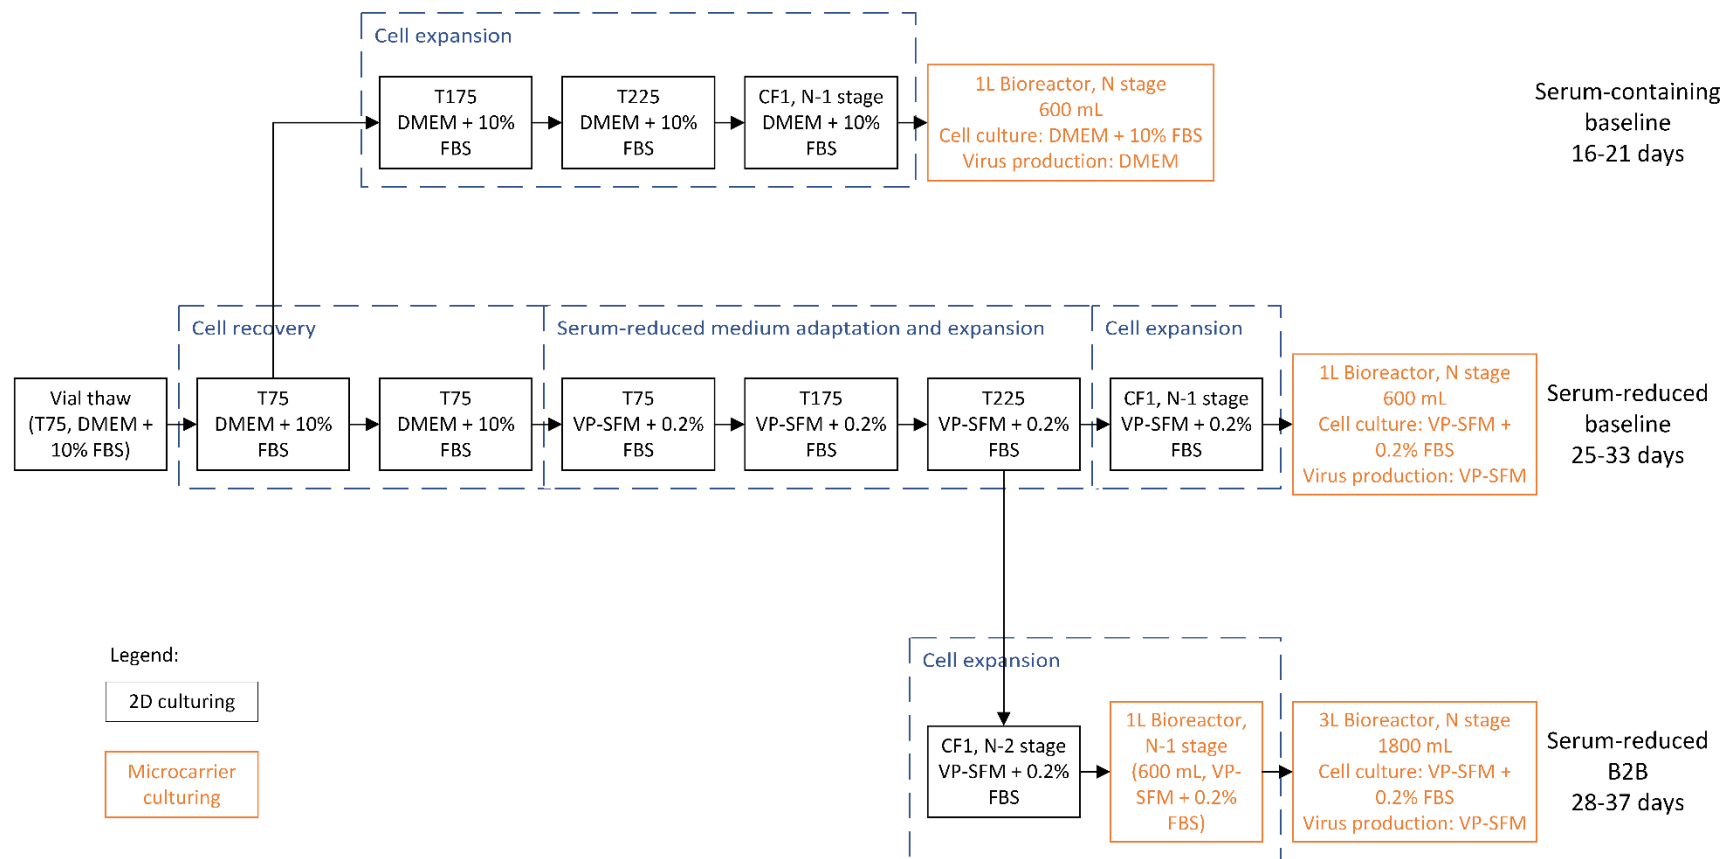

**Figure S5** Expansion flow chart for Vero cell culture and HSV-1 production. For the serum-containing baseline process, the cells were recovered and amplified with 2D culturing in DMEM + 10% FBS medium, and finally inoculated into a 1L bioreactor for virus production. For the serum-reduced baseline process, the cells were vial thawed and passaged twice in T75 flask in DMEM + 10% FBS medium for cell recovery, and then directly adapted to VP-SFM + 0.2% FBS medium and amplified simultaneously in 2D culture vessels, then inoculated into a 1L bioreactor for virus production. For the serum reduced bead-to-bead transfer process, the cells cultured in CF1 were inoculated into a 1L bioreactor as N-1 stage. Then bead-to-bead transfer was performed and

the cells were inoculated into a 3L bioreactor for N-stage virus production. Serum was only used during cell expansion, and serum-free medium was used during virus production in N-stage.

Supplementary tables:

**Table S1** Experimental design

| Category                                                           | Evaluated Parameter                                                                                             | Culture Vessel                                                   | Evaluated Performance                                                                                                                                                  |
|--------------------------------------------------------------------|-----------------------------------------------------------------------------------------------------------------|------------------------------------------------------------------|------------------------------------------------------------------------------------------------------------------------------------------------------------------------|
| Medium composition optimization                                    | Basal medium type                                                                                               | T flask                                                          | Doubling time, viability, virus titer                                                                                                                                  |
|                                                                    | Serum concentration                                                                                             |                                                                  |                                                                                                                                                                        |
|                                                                    | Glutamine supplement type and concentration                                                                     |                                                                  |                                                                                                                                                                        |
| Baseline process transfer from spinner flask to bioreactors        | Agitation speed                                                                                                 | Bioreactor                                                       | Microcarrier uniformity                                                                                                                                                |
|                                                                    | Test baseline process in bioreactors                                                                            | Bioreactor                                                       | Cell growth rate, viability, metabolite levels, and virus titer                                                                                                        |
| Preliminary bead-to-bead transfer process development              | TrypLE concentration                                                                                            | Spinner flask                                                    | Detaching percentage, overall recovery proportion, and viability drop after digestion                                                                                  |
|                                                                    | Agitation during digestion                                                                                      |                                                                  |                                                                                                                                                                        |
|                                                                    | Residue volume during washing procedure                                                                         |                                                                  | Cell growth rate, viability, metabolite levels, and virus titer in subculture                                                                                          |
|                                                                    | Transfer operation reduction                                                                                    |                                                                  |                                                                                                                                                                        |
|                                                                    | Cell and microcarrier separation                                                                                |                                                                  |                                                                                                                                                                        |
|                                                                    | Medium exchange in subculture                                                                                   |                                                                  |                                                                                                                                                                        |
| Virus production optimization of the bead-to-bead transfer process | 47 parameters from historical experiments                                                                       | N/A                                                              | Correlation with virus titer                                                                                                                                           |
|                                                                    | Residue EDTA and TrypLE concentration in subculture                                                             | Spinner flask                                                    | Detaching percentage, overall recovery proportion, and viability drop after digestion                                                                                  |
|                                                                    | Shear stress during agitation                                                                                   |                                                                  |                                                                                                                                                                        |
|                                                                    | Cell densities of inoculation                                                                                   |                                                                  | Cell growth rate, viability, metabolite levels, and virus titer in subculture                                                                                          |
|                                                                    | CCI                                                                                                             |                                                                  |                                                                                                                                                                        |
| Bead-to-bead transfer process in bioreactors                       | Test optimized bead-to-bead transfer, and subsequent cell culture and virus production processes in bioreactors | 1L bioreactor for N-1 stage<br>1L and 3L bioreactors for N-stage | Detaching percentage, overall recovery proportion, and viability drop after digestion<br>Cell growth rate, viability, metabolite levels, and virus titer in subculture |

**Table S2** Performance and fluid dynamics parameters measured or calculated during the whole procedure

| Process stage                                      | Measured or calculated performance parameters                                                                                                                                                                                                                                                                                                                                                                                                                                                                                                                                                                                                                                                                                                                                                                                                                                                                                                                                                                                                                         |
|----------------------------------------------------|-----------------------------------------------------------------------------------------------------------------------------------------------------------------------------------------------------------------------------------------------------------------------------------------------------------------------------------------------------------------------------------------------------------------------------------------------------------------------------------------------------------------------------------------------------------------------------------------------------------------------------------------------------------------------------------------------------------------------------------------------------------------------------------------------------------------------------------------------------------------------------------------------------------------------------------------------------------------------------------------------------------------------------------------------------------------------|
| Vial thaw and cell amplification with 2D culturing | Measured: VIA and VCD during cell passage<br>Calculated: specific growth rate                                                                                                                                                                                                                                                                                                                                                                                                                                                                                                                                                                                                                                                                                                                                                                                                                                                                                                                                                                                         |
| N-1 cell amplification with microcarrier           | Measured: daily sampling and measure of VIA, VCD, osmolality, pH, pCO <sub>2</sub> , pO <sub>2</sub> , concentrations of Na <sup>+</sup> , K <sup>+</sup> , glucose, ammonium, lactose, glutamine, and glutamic acid.<br>Calculated: specific growth rate                                                                                                                                                                                                                                                                                                                                                                                                                                                                                                                                                                                                                                                                                                                                                                                                             |
| Bead-to-bead transfer                              | <p>Measured: VIA and VCD before the microcarrier sedimentation of wash (“before wash” for short), before digestion, and before inoculation<br/>Calculated: viability drop, overall recovery proportion, and calibrated overall recovery proportion.</p> $Viability\ drop = VIA_{before\ wash} - VIA_{before\ inoculation}$ $Overall\ recovery\ proportion = \frac{VCD_{inoculum} \times Vol_{inoculum}}{VCD_{before\ wash} \times Vol_{before\ wash}} \times 100\%$ $Overall\ recovery\ proportion_{calibrated} = \frac{VCD_{inoculum} \times Vol_{inoculum}}{VCD_{before\ wash} \times Vol_{before\ wash} - Sampling\ loss} \times 100\% *$ <p>Sampling loss was calculated as followed:</p> $Sampling\ loss = VCD_{Sample\ 1} \times Vol_{Sample\ 1} + VCD_{Sample\ 2} \times Vol_{Sample\ 2} + \dots + VCD_{Sample\ n} \times Vol_{Sample\ n}$ <p>* Calibrated overall recovery proportions were only used in experiments conducted with spinner flasks. The overall recovery proportions in bioreactors were not calibrated as sampling loss was neglectable.</p> |
| N-stage cell culturing                             | Measured: daily sampling and measurement of VIA, VCD, osmolality, pH, pCO <sub>2</sub> , pO <sub>2</sub> , concentrations of Na <sup>+</sup> , K <sup>+</sup> , glucose, ammonium, lactose, glutamine, and glutamic acid.<br>Calculated: specific growth rate                                                                                                                                                                                                                                                                                                                                                                                                                                                                                                                                                                                                                                                                                                                                                                                                         |
| Virus infection and amplification                  | Measured: daily sampling and measurement of VIA, VCD, osmolality, pH, pCO <sub>2</sub> , pO <sub>2</sub> , concentrations of Na <sup>+</sup> , K <sup>+</sup> , glucose, ammonium, lactose, glutamine, and glutamic acid; sampling and measurement of volumetric virus titers at different HPis.<br>Calculated: specific growth rate, cell-specific virus production, normalized volumetric titer                                                                                                                                                                                                                                                                                                                                                                                                                                                                                                                                                                                                                                                                     |
| Fluid dynamics parameters                          | <p>Power input per volume:</p> $P/V = N_p n^3 \rho D_i^5 / V$                                                                                                                                                                                                                                                                                                                                                                                                                                                                                                                                                                                                                                                                                                                                                                                                                                                                                                                                                                                                         |

| Process stage | Measured or calculated performance parameters                                                                                                                                                                                                                                                         |
|---------------|-------------------------------------------------------------------------------------------------------------------------------------------------------------------------------------------------------------------------------------------------------------------------------------------------------|
|               | Kolmogorov eddy length:                                                                                                                                                                                                                                                                               |
|               | $\eta = [v^3 / (N_p n^3 D_i^5 / V)]^{1/4}$                                                                                                                                                                                                                                                            |
|               | Maximum shear stress:                                                                                                                                                                                                                                                                                 |
|               | $\tau_{max} = 5.33 \rho (v N_p n^3 D_i^5 / V)^{1/2}$                                                                                                                                                                                                                                                  |
|               | $\eta$ is Kolmogorov eddy size (m), $v$ is kinematic viscosity (m <sup>2</sup> /s), $V$ is volume (m <sup>3</sup> ), $N_p$ is impeller's Newton number or impeller power number, $n$ is agitation speed (r/s), $\rho$ is culture medium density (kg/m <sup>3</sup> ), $D_i$ is impeller diameter (m). |

**Table S3** Analyzed operation and performance parameters

| Process stage       | Parameter                                                | Short name               | Type                  | Tested range | Unit                                  |
|---------------------|----------------------------------------------------------|--------------------------|-----------------------|--------------|---------------------------------------|
| N-1 culturing       | Transfer VCD - N-1 stage                                 | Transfer_VCD             | Process parameter     | 1.56 - 1.93  | 10 <sup>5</sup> cells/cm <sup>2</sup> |
| N-1 culturing       | VIA before digestion - N-1 stage                         | N-1_VIA_before_digestion | Performance parameter | 99.1 - 99.2  | %                                     |
| Digestion           | TrypLE exposure time                                     | Tryp_exposure_time       | Process parameter     | 54 - 76      | min                                   |
| Digestion           | Shear stress of the beginning 30/35 min during digestion | Shear35                  | Process parameter     | 0.16 - 0.19  | Pa                                    |
| Digestion           | Shear stress of the last 5 min during digestion          | Shear5                   | Process parameter     | 0.16 - 1.01  | Pa                                    |
| Digestion           | Cell/microcarrier separation                             | MC_cell_sep              | Process parameter     | Yes/no       | N/A                                   |
| Digestion           | VIA after digestion - N-1 stage                          | VIA_post_digestion       | Performance parameter | 95.5 - 98.2  | %                                     |
| Termination         | TrypLE concentration after termination                   | Tryp_post_ter            | Mixed                 | 0.74 - 1.58  | X                                     |
| Termination         | EDTA concentration after termination                     | EDTA_post_ter            | Mixed                 | 0.51 - 0.96  | mM                                    |
| Termination         | Medium proportion after termination                      | Med_prop_post_ter        | Mixed                 | 0 - 39.4     | %                                     |
| N-stage inoculation | Inoculation VCD - N-stage                                | Ino_VCD                  | Process parameter     | 0.13 - 0.25  | 10 <sup>5</sup> cells/cm <sup>2</sup> |



| Process stage          | Parameter                                          | Short name         | Type                  | Tested range  | Unit                                  |
|------------------------|----------------------------------------------------|--------------------|-----------------------|---------------|---------------------------------------|
| N-stage inoculation    | Inoculum volume - N-stage                          | Seed_vol           | Mixed                 | 2.37 - 15.5   | mL                                    |
| N-stage inoculation    | Calculated tryptLE concentration after inoculation | Try_post_ino       | Process parameter     | 0.026 - 0.30  | X                                     |
| N-stage inoculation    | Calculated EDTA concentration after inoculation    | EDTA_post_ino      | Process parameter     | 0.016 - 0.18  | mM                                    |
| N-stage inoculation    | VIA upon inoculation                               | VIA_upon_ino       | Performance parameter | 96.8 - 100    | %                                     |
| N-stage cell culturing | Medium exchange after attaching period             | Ex_post_att        | Process parameter     | Yes/no        | N/A                                   |
| N-stage cell culturing | TryptLE concentration after medium exchange        | Tryp_post_ex       | Process parameter     | 0.024 - 0.094 | X                                     |
| N-stage cell culturing | EDTA concentration after medium exchange           | EDTA_post_ex       | Process parameter     | 0.016 - 0.065 | mM                                    |
| N-stage cell culturing | VCD one day before infection                       | VCD_1d_before_inf  | Performance parameter | 0.45 - 0.94   | 10 <sup>5</sup> cells/cm <sup>2</sup> |
| N-stage cell culturing | VIA one day before infection                       | VIA_1d_before_inf  | Performance parameter | 96.7 - 99.7   | %                                     |
| N-stage cell culturing | VIA right before infection                         | VIA_upon_inf       | Performance parameter | 99.3 - 100    | %                                     |
| N-stage cell culturing | Cell specific growth rate of day 1 - N stage       | GR_day1            | Performance parameter | 0.18 - 1.35   | day <sup>-1</sup>                     |
| N-stage cell culturing | Cell specific growth rate of day 2 - N stage       | GR_day2            | Performance parameter | 0.62 - 1.21   | day <sup>-1</sup>                     |
| N-stage cell culturing | Cell specific growth rate of day 3 - N stage       | GR_day3            | Performance parameter | 0.16 - 0.68   | day <sup>-1</sup>                     |
| N-stage cell culturing | Glucose concentration one day before infection     | Gluc_1d_before_inf | Performance parameter | 2.4 - 3.5     | g/L                                   |
| N-stage cell culturing | Glucose concentration right before infection       | Gluc_before_inf    | Mixed                 | 1.25 - 2.03   | g/L                                   |

| Process stage    | Parameter                                                             | Short name       | Type                  | Tested range  | Unit                                  |
|------------------|-----------------------------------------------------------------------|------------------|-----------------------|---------------|---------------------------------------|
| Virus production | CCI                                                                   | CCI              | Process parameter     | 0.80 - 1.54   | 10 <sup>5</sup> cells/cm <sup>2</sup> |
| Virus production | VCD one day after infection                                           | VCD_1d_post_inf  | Performance parameter | 0.49 - 1.71   | 10 <sup>5</sup> cells/cm <sup>2</sup> |
| Virus production | VCD two days after infection                                          | VCD_2d_post_inf  | Performance parameter | 0.27 - 0.86   | 10 <sup>5</sup> cells/cm <sup>2</sup> |
| Virus production | VIA one day after infection                                           | VIA_1d_post_inf  | Performance parameter | 74.5 - 99.6   | %                                     |
| Virus production | VIA two days after infection                                          | VIA_2d_post_inf  | Performance parameter | 59.0 - 82.4   | %                                     |
| Virus production | Cell specific growth rate of the first day after infection - N stage  | GR_1d_post_inf   | Performance parameter | -0.58 - 0.61  | day <sup>-1</sup>                     |
| Virus production | Cell specific growth rate of the second day after infection - N stage | GR_2d_post_inf   | Performance parameter | -1.22 - -0.59 | day <sup>-1</sup>                     |
| Virus production | Glucose concentration one day after infection                         | Gluc_1d_post_inf | Mixed                 | 2.59 - 3.73   | g/L                                   |
| Virus production | Glucose concentration two days after infection                        | Gluc_2d_post_inf | Mixed                 | 1.81 - 3.44   | g/L                                   |
| Virus production | Lactate concentration one day after infection                         | Lac_1d_post_inf  | Performance parameter | 0.81 - 1.73   | g/L                                   |
| Virus production | Lactate concentration two days after infection                        | Lac_2d_post_inf  | Performance parameter | 1.07 - 2.53   | g/L                                   |
| Virus production | Ammonia concentration one day after infection                         | Amo_1d_post_inf  | Performance parameter | 1.73 - 2.64   | g/L                                   |
| Virus production | Ammonia concentration two days after infection                        | Amo_2d_post_inf  | Performance parameter | 2.35 - 3.00   | mM                                    |
| Virus production | Glutamine concentration one day after infection                       | Gln_1d_post_inf  | Performance parameter | 1.22 - 2.13   | mM                                    |
| Virus production | Glutamine concentration two days after infection                      | Gln_2d_post_inf  | Performance parameter | 0.81 - 1.21   | mM                                    |

| Process stage    | Parameter                                                            | Short name              | Type                  | Tested range | Unit |
|------------------|----------------------------------------------------------------------|-------------------------|-----------------------|--------------|------|
| Virus production | Normalized titer: ratio of sample/internal control infectivity titer | Titer_sample_vs_intctrl | Performance parameter | 8.30 - 72.3  | %    |

**Table S4** Marks of secondary correlation analysis

| Parameters         | Negative mark | Positive mark | Total mark |
|--------------------|---------------|---------------|------------|
| Transfer_VCD       | 0             | 3             | 3          |
| Tryp_exposure_time | 0             | 0             | 0          |
| Shear35            | -4            | 1             | -3         |
| Shear5             | -7            | 0             | -7         |
| MC_cell_sep        | -1            | 0             | -1         |
| Ino_VCD            | -4            | 0             | -4         |
| Ex_post_att        | -2            | 3             | 1          |
| Tryp_post_ex       | -10           | 0             | -10        |
| EDTA_post_ex       | -10           | 0             | -10        |
| CCI                | -4            | 0             | -4         |

**Table S5** Levels of selected operation parameters in original and optimized processes

| Parameter                                                               | Original level <sup>*1</sup> | Optimized level <sup>*2</sup> |
|-------------------------------------------------------------------------|------------------------------|-------------------------------|
| EDTA concentration after medium exchange (mM)                           | <0.64                        | <0.16                         |
| TrypLE concentration after medium exchange (X)                          | <0.08                        | <0.02                         |
| Maximum shear stress of last 5 min during digestion (N/m <sup>2</sup> ) | 1.02                         | 0.38                          |
| CCI (10 <sup>5</sup> cells/cm <sup>2</sup> )                            | 1.5±0.2                      | 1.1±0.2                       |
| Inoculation density (10 <sup>5</sup> cells/cm <sup>2</sup> )            | 0.15±0.3                     | 0.12±0.3                      |

\*1 Average level of historical data.

\*2 Theoretical level for process design. Applied level may fluctuate around 20% due to operation deviations.

**Table S6** Abbreviations

| Abbreviation | Full name                                    |
|--------------|----------------------------------------------|
| B2B          | Bead-to-bead transfer                        |
| BM           | Basal medium                                 |
| BR           | Bioreactor                                   |
| CCI          | Cell concentration at the point of infection |
| CF           | Cell factory                                 |
| DMEM         | Dulbecco's modified eagle medium             |
| DO           | Dissolved oxygen                             |
| DPBS         | Dulbecco's phosphate-buffered saline         |
| FBS          | Fetal bovine serum                           |
| HPI          | Hour post-infection                          |
| HSV-1        | Herpes simplex virus type-1                  |
| JS           | Just suspended                               |
| OV           | Oncolytic virus                              |
| PCA          | Principal component analysis                 |
| rpm          | Revolutions per minute                       |
| SCM          | Serum-containing medium                      |
| SP           | Spinner flask                                |
| SRM          | Serum-reduced medium                         |
| STI          | Soybean trypsin inhibitor                    |
| VCD          | Viable cell density                          |
| VIA          | Viability                                    |
